# Supplementary figures and images for: Calcineurin inhibitor toxicity in a renal transplant recipient
Source: PubMed Central journal article supplement — NDT Plus. 2009 Feb 4;2(2):175–6. doi: 10.1093/ndtplus/sfp007 (PMC4421359; doi:10.1093/ndtplus/sfp007), 2009-02-04

Figure 1

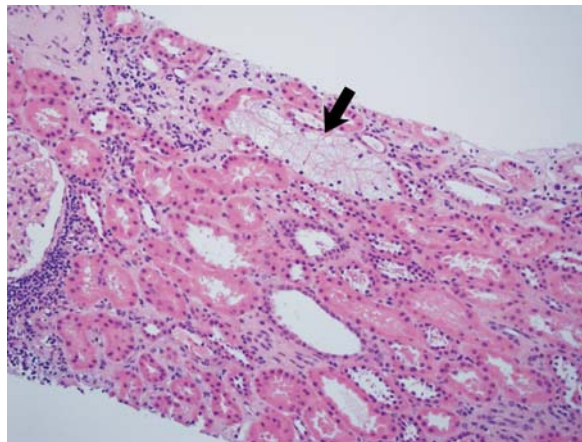

Figure 2

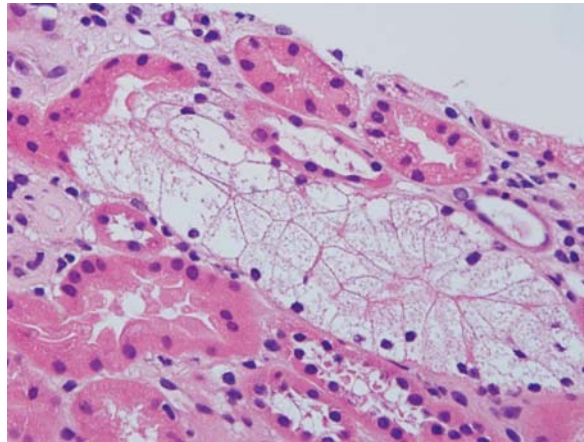

Supplement: supp_sfp007_sfp007_suppl.pdf [file supp_sfp007_sfp007_suppl.pdf]
